# Supplementary material
Source: publisher figshare collection journal article supplement (https://tandf.figshare.com/ndownloader/files/20779635)
Supplement: Supplementary file 1 [file 20779635]

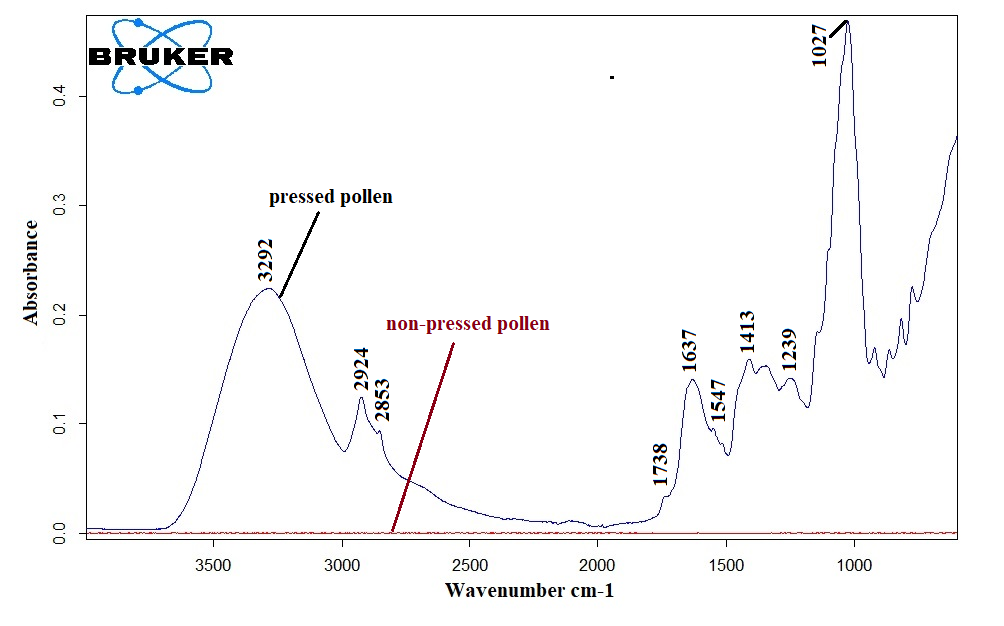


**Figure S1** Comparison spectra of pressed pollen and non-pressed pollen on the diamond crystal of ATR accessory.
